# Supplementary material for: Optimizing School Food Supply: Integrating Environmental, Health, Economic, and Cultural Dimensions of Diet Sustainability with Linear Programming
Source: PubMed Central journal article supplement (PMC6747157; doi:10.3390/ijerph16173019), 2019-08-21
Supplement: ijerph-16-03019-s001.pdf [file ijerph-16-03019-s001.pdf]

**Table S1.** Nutrient constraints applied during all linear optimization procedures.

**Reference pupil – nutritional constraints for optimized food supply**

|                                                      | Lower limit | Upper limit |
|------------------------------------------------------|-------------|-------------|
| <b>Energy (kcal)<sup>a</sup></b>                     | 604         | 604         |
| <b>Carbohydrates (%E)<sup>b</sup></b>                | 45          | 60          |
| <b>Fat (%E)<sup>b</sup></b>                          | 22          | 40          |
| <b>Protein (%E)<sup>b</sup></b>                      | 10          | 20          |
| <b>Fiber (%E)<sup>c</sup></b>                        | 2           | —           |
| <b>Saturated fatty acids (%E)<sup>b</sup></b>        | —           | 10          |
| <b>Mono unsaturated fatty acids (%E)<sup>b</sup></b> | 10          | 20          |
| <b>Poly unsaturated fatty acids (%E)<sup>b</sup></b> | 5           | 10          |
| <b>Vitamin A (µg)<sup>c</sup></b>                    | 168         | —           |
| <b>Vitamin D (µg)<sup>c</sup></b>                    | 3           | 30          |
| <b>Vitamin E (mg)<sup>c</sup></b>                    | 2.2         | 90          |
| <b>Thiamine (mg)<sup>c</sup></b>                     | 0.3         | —           |
| <b>Riboflavin (mg)<sup>c</sup></b>                   | 0.4         | —           |
| <b>Vitamin C (mg)<sup>c</sup></b>                    | 15.3        | 300         |
| <b>Niacin (mg)<sup>c</sup></b>                       | 4.2         | 270         |
| <b>Vitamin B6 (mg)<sup>c</sup></b>                   | 0.4         | 7.5         |
| <b>Vitamin B12 (µg)<sup>c</sup></b>                  | 0.5         | —           |
| <b>Folate (µg)<sup>c</sup></b>                       | 57.6        | 300         |
| <b>Phosphor (mg)<sup>c</sup></b>                     | 190.8       | 900         |
| <b>Iodine (µg)<sup>c</sup></b>                       | 41.4        | 180         |
| <b>Iron (mg)<sup>c</sup></b>                         | 3.3         | 7.5         |
| <b>Calcium (mg)<sup>c</sup></b>                      | 246         | 750         |
| <b>Potassium (mg)<sup>c</sup></b>                    | 810         | —           |
| <b>Magnesium (mg)<sup>c</sup></b>                    | 76.5        | —           |
| <b>Salt (g)<sup>d</sup></b>                          | —           | 3.6         |
| <b>Selenium (µg)<sup>c</sup></b>                     | 11.7        | 90          |
| <b>Zink (mg)<sup>c</sup></b>                         | 2.7         | 7.5         |
| <b>Omega-3 fatty acids (%E)<sup>c</sup></b>          | 3.3         | —           |

<sup>a</sup>Based on 30% of daily estimated energy requirement (EER), averaged values over 10 grades (preparatory class to ninth grade) and both sexes.

<sup>b</sup>Lower and upper limits based on 30% of daily recommended intake ranges, averaged values over 10 grades (preparatory class to ninth grade) and both sexes.

<sup>c</sup>Lower limit based on 30% of daily recommended intakes (RIs) and upper limit based on 30% of daily Upper intake levels (ULs), averaged values over 10 grades (preparatory class to ninth grade) and both sexes.

<sup>d</sup>Upper limit based on 30% of daily recommended intake (RIs).

**Table S2.** Amounts, cost, RDs, and associated GHGE (CO<sub>2</sub>eq) of individual food items in observed and optimized supply, respectively, when minimizing GHGE and applying constraints on nutritional adequacy only (Model 1, GHGE<sub>min</sub>).

| Food            | School 1 (SEK 6.50 <sup>a</sup> ) |           |                             |                                     | School 2 (SEK 5.54 <sup>a</sup> ) |           |                             |                                     | School 3 (SEK 3.88 <sup>a</sup> ) |           |                             |                                     |
|-----------------|-----------------------------------|-----------|-----------------------------|-------------------------------------|-----------------------------------|-----------|-----------------------------|-------------------------------------|-----------------------------------|-----------|-----------------------------|-------------------------------------|
|                 | Amount <sup>b</sup> (g)           |           | Change <sup>c</sup> (RD, %) | CO <sub>2</sub> eq <sup>d</sup> (g) | Amount <sup>b</sup> (g)           |           | Change <sup>c</sup> (RD, %) | CO <sub>2</sub> eq <sup>d</sup> (g) | Amount <sup>b</sup>               |           | Change <sup>c</sup> (RD, %) | CO <sub>2</sub> eq <sup>d</sup> (g) |
|                 | Observed                          | Optimized |                             |                                     | Observed                          | Optimized |                             |                                     | Observed                          | Optimized |                             |                                     |
| Crisp bread     | 0.03                              | 59.39     | 209156%                     | 17.8                                |                                   |           |                             |                                     |                                   |           |                             |                                     |
| Wheat bran      |                                   |           |                             |                                     |                                   |           |                             |                                     | 0.24                              | 4.5       | 1777%                       | 0.9                                 |
| Semolina        |                                   |           |                             |                                     | 0.86                              | 55.24     | 6323%                       | 24.3                                | 0.55                              | 17.95     | 3193%                       | 7.9                                 |
| Potato          | 22.90                             | 133.43    | 483%                        | 13.3                                | 5.52                              | 212.57    | 3748%                       | 21.3                                |                                   |           |                             |                                     |
| Lentils dried   |                                   |           |                             |                                     |                                   |           |                             |                                     | 0.44                              | 3.92      | 788%                        | 1.3                                 |
| Chickpeas dried | 0.13                              | 53.19     | 40338%                      | 19.7                                | 0.06                              | 56.54     | 87254%                      | 20.92                               |                                   |           |                             |                                     |
| Olive oil       |                                   |           |                             |                                     |                                   |           |                             |                                     | 0.15                              | 3.61      | 2284%                       | 7.4                                 |
| Margarine 80%   | 0.53                              | 2.35      | 341%                        | 3.7                                 | 0.52                              | 0.54      | 4%                          | 0.85                                |                                   |           |                             |                                     |
| Parsley         | 0.05                              | 42.27     | 91729%                      | 14.8                                |                                   |           |                             |                                     |                                   |           |                             |                                     |
| Carrots         |                                   |           |                             |                                     | 1.29                              | 11.89     | 818%                        | 1.31                                | 11.36                             | 14.94     | 32%                         | 1.6                                 |
| Lingonberries   |                                   |           |                             |                                     |                                   |           |                             |                                     | 0.38                              | 6.63      | 1652%                       | 5.7                                 |
| Anchovies       |                                   |           |                             |                                     |                                   |           |                             |                                     | 0.06                              | 48.62     | 80149%                      | 14.1                                |
| Pickled herring | 0.063                             | 20.65     | 32602%                      | 12.8                                | 0.08                              | 5.2       | 6249%                       | 3.2                                 | 0.04                              | 0.94      | 49943%                      | 11.7                                |
| Breaded herring | 0.036                             | 6.61      | 18511%                      | 4.1                                 |                                   |           |                             |                                     |                                   |           |                             |                                     |
| Salt            |                                   |           |                             |                                     | 0.52                              | 0.06      | -88%                        | 0.02                                | 0.04                              | 0.22      | 480%                        | 0.1                                 |
| <b>Total</b>    |                                   |           |                             | <b>86</b>                           |                                   |           |                             | <b>72</b>                           |                                   |           |                             | <b>51</b>                           |
|                 |                                   |           |                             | <b>(10.6%)<sup>e</sup></b>          |                                   |           |                             | <b>(7.0%)<sup>e</sup></b>           |                                   |           |                             | <b>(5.3%)<sup>e</sup></b>           |

<sup>a</sup>Cost of food supply per reference portion after optimization.

<sup>b</sup>Absolute raw amount of individual food items in observed and optimized supply, respectively.

<sup>c</sup>Relative change from observed food supply during the school year 2015/2016 after optimization.

<sup>d</sup>Amount of carbon dioxide equivalents (CO<sub>2</sub>eq) of food supply after optimization.

<sup>e</sup>Percentage of observed GHGE

GHGE, Greenhouse gas emissions.

GHGE<sub>min</sub>, optimized for lowest achievable GHGE.

**Table S3.** ARD, cost, and associated GHGE (CO<sub>2</sub>eq) when minimizing GHGE while applying constraints on nutritional adequacy and maximum allowed RD from observed food supply (Model 1, GHGE<sub>min</sub>).

| School #                                | ARD (%) |      |      | Cost <sup>a</sup> (SEK) |              |              | CO <sub>2</sub> eq <sup>b</sup> (g) |             |            | # of food items Removed <sup>c</sup> |            |            | # of food items Reduced <sup>c</sup> |            |            | # of food items Increased <sup>c</sup> |            |            |
|-----------------------------------------|---------|------|------|-------------------------|--------------|--------------|-------------------------------------|-------------|------------|--------------------------------------|------------|------------|--------------------------------------|------------|------------|----------------------------------------|------------|------------|
|                                         | 1       | 2    | 3    | 1                       | 2            | 3            | 1                                   | 2           | 3          | 1                                    | 2          | 3          | 1                                    | 2          | 3          | 1                                      | 2          | 3          |
| <b>Observed value</b>                   |         |      |      | <b>9.07</b>             | <b>10.63</b> | <b>11.22</b> | <b>810</b>                          | <b>1022</b> | <b>967</b> | <b>499</b>                           | <b>539</b> | <b>367</b> | <b>499</b>                           | <b>539</b> | <b>367</b> | <b>499</b>                             | <b>539</b> | <b>367</b> |
| <b>Max. RD per food (%)<sup>d</sup></b> |         |      |      |                         |              |              |                                     |             |            |                                      |            |            |                                      |            |            |                                        |            |            |
| Unconstrained <sup>e</sup>              | 887     | 293  | 480  | 6.50                    | 5.54         | 3.88         | 86                                  | 72          | 51         | 492                                  | 532        | 358        | 0                                    | 1          | 0          | 7                                      | 6          | 9          |
| 1000                                    | 229     | 235  | 203  | 9.16                    | 8.63         | 4.11         | 174                                 | 127         | 126        | 423                                  | 453        | 317        | 2                                    | 1          | 4          | 74                                     | 85         | 46         |
| 500                                     | 166     | 178  | 164  | 8.47                    | 8.75         | 5.57         | 201                                 | 180         | 192        | 410                                  | 427        | 300        | 2                                    | 3          | 2          | 87                                     | 109        | 65         |
| 300                                     | 145     | 150  | 137  | 8.03                    | 8.17         | 5.85         | 224                                 | 212         | 223        | 379                                  | 399        | 292        | 1                                    | 1          | 1          | 119                                    | 139        | 74         |
| 100                                     | 99.5    | 99.2 | 99.0 | 7.27                    | 7.71         | 6.66         | 277                                 | 295         | 293        | 301                                  | 261        | 254        | 3                                    | 3          | 2          | 195                                    | 275        | 111        |
| 99                                      | 98.5    | 98.2 | 98.1 | 7.28                    | 7.70         | 6.72         | 282                                 | 302         | 300        | 0                                    | 0          | 0          | 302                                  | 262        | 251        | 197                                    | 277        | 116        |
| 90                                      | 89.6    | 89.4 | 88.9 | 7.41                    | 8.11         | 7.58         | 325                                 | 361         | 373        | 0                                    | 0          | 0          | 301                                  | 247        | 253        | 198                                    | 292        | 114        |
| 80                                      | 79.5    | 79.6 | 79.7 | 7.56                    | 8.73         | 8.14         | 373                                 | 445         | 463        | 0                                    | 0          | 0          | 301                                  | 240        | 246        | 198                                    | 299        | 121        |
| 70                                      | 69.3    | 69.7 | 69.6 | 7.77                    | 9.31         | 10.14        | 423                                 | 540         | 600        | 0                                    | 0          | 0          | 281                                  | 228        | 203        | 218                                    | 311        | 164        |
| 60                                      | 59.6    | 59.8 | ns   | 7.97                    | 9.73         | ns           | 477                                 | 653         | ns         | 0                                    | 0          | ns         | 265                                  | 219        | ns         | 234                                    | 320        | ns         |
| 50                                      | 49.6    | 49.7 | ns   | 8.28                    | 10.44        | ns           | 549                                 | 829         | ns         | 0                                    | 0          | ns         | 253                                  | 207        | ns         | 246                                    | 332        | ns         |
| 45                                      | 44.7    | 44.7 | ns   | 8.73                    | 10.92        | ns           | 605                                 | 965         | ns         | 0                                    | 0          | ns         | 237                                  | 206        | ns         | 262                                    | 333        | ns         |
| 40                                      | 39.8    | ns   | ns   | 9.20                    | ns           | ns           | 680                                 | ns          | ns         | 0                                    | ns         | ns         | 207                                  | ns         | ns         | 292                                    | ns         | ns         |

<sup>a</sup> Cost of food supply per reference portion after optimization

<sup>b</sup> Amount of carbon dioxide equivalents (CO<sub>2</sub>eq) of food supply per reference portion after optimization.

<sup>c</sup> Number of foods removed, reduced or increased after optimization.

<sup>d</sup> Maximum allowed (negative or positive) relative deviation for individual food items from observed food supply during the school year 2015/2016.

<sup>e</sup> No constraint on maximum allowed (negative or positive) relative deviation individual food items from observed food supply during the school year 2015/2016.

ARD, Average relative deviation from observed food supply during the school year 2015/2016 after optimization.

GHGE, Greenhouse gas emissions.

GHGE<sub>min</sub>, optimized for lowest achievable GHGE.

RD, relative deviation from observed food supply during the school year 2015/2016.

SEK, Swedish Krona.

—, No achievable solution.



|                     |                              | GHGE Unconstrained <sup>1</sup> |                |              | -10% GHGE      |                |          | -20% GHGE      |                |          | -30% GHGE      |                |          | -40% GHGE      |                |          | -50% GHGE      |                |              |                |               |  |                |  |  |                |  |  |                |  |  |                |  |  |                |  |  |
|---------------------|------------------------------|---------------------------------|----------------|--------------|----------------|----------------|----------|----------------|----------------|----------|----------------|----------------|----------|----------------|----------------|----------|----------------|----------------|--------------|----------------|---------------|--|----------------|--|--|----------------|--|--|----------------|--|--|----------------|--|--|----------------|--|--|
|                     |                              | RD                              |                |              | RD             |                |          | RD             |                |          | RD             |                |          | RD             |                |          | RD             |                |              |                |               |  |                |  |  |                |  |  |                |  |  |                |  |  |                |  |  |
|                     |                              | School 1                        | School 2       | School 3     | School 1       | School 2       | School 3 | School 1       | School 2       | School 3 | School 1       | School 2       | School 3 | School 1       | School 2       | School 3 | School 1       | School 2       | School 3     |                |               |  |                |  |  |                |  |  |                |  |  |                |  |  |                |  |  |
| Food group          | Food subgroup                |                                 |                |              |                |                |          |                |                |          |                |                |          |                |                |          |                |                |              |                |               |  |                |  |  |                |  |  |                |  |  |                |  |  |                |  |  |
| Eggs                | Eggs, raw/prepared           | 3 items, -100%                  |                |              | 2 items, -100% |                |          | 3 items, -100% |                |          | 2 items, -100% |                |          | 3 items, -100% |                |          | 2 items, -100% |                |              | 3 items, -100% |               |  | 2 items, -100% |  |  |                |  |  |                |  |  |                |  |  |                |  |  |
| Other               | Juice and nectar             |                                 |                |              |                |                |          |                |                |          |                |                |          |                |                |          |                |                |              |                |               |  |                |  |  |                |  |  |                |  |  |                |  |  |                |  |  |
| Solid fats and oils | Butter                       | -100%                           |                | 1 item, -63% | -100%          |                | -100%    | -100%          |                | -82%     | -100%          |                | -50%     | -100%          |                | -11%     | -100%          |                | -100%        |                | 1 item, -100% |  | 1 item, +143%  |  |  |                |  |  |                |  |  |                |  |  |                |  |  |
|                     | Margarine                    | -100%                           | -67%           | 1 item, -17% | -86%           | -36%           |          | -23%           | -34%           |          | +15%           |                |          | +114%          | +63%           |          | +110%          | +136%          |              |                |               |  |                |  |  |                |  |  |                |  |  |                |  |  |                |  |  |
|                     | Rapeseed oil                 |                                 | +33%           | -100%        |                |                | -100%    |                |                | -100%    |                |                | -100%    |                |                | -98%     |                |                |              |                |               |  | -100%          |  |  |                |  |  |                |  |  |                |  |  |                |  |  |
| Fish                | Salmon                       |                                 |                |              |                |                |          |                |                |          |                |                |          |                |                |          |                |                |              |                |               |  |                |  |  |                |  |  |                |  |  |                |  |  |                |  |  |
|                     | White fish                   |                                 |                |              |                |                |          |                |                |          |                |                |          |                |                |          |                |                |              |                |               |  |                |  |  |                |  |  |                |  |  |                |  |  |                |  |  |
| Fruits and berries  | Berries                      |                                 |                |              |                |                |          |                |                |          |                |                |          |                |                |          |                |                |              |                |               |  |                |  |  |                |  |  |                |  |  |                |  |  |                |  |  |
| Vegetables          | Legumes                      | +321%                           |                |              | +380%          |                |          | +429%          |                |          | +475%          |                |          | +496%          |                |          | +468%          |                |              |                |               |  |                |  |  |                |  |  |                |  |  |                |  |  |                |  |  |
| Roots and tubers    | Potatoes                     | +112%                           | +45%           |              | +124%          | +128%          |          | +168%          | +159%          |          | +221%          | +192%          |          |                | +289%          |          |                |                | +84%         |                |               |  |                |  |  |                |  |  |                |  |  |                |  |  |                |  |  |
|                     | Pulses                       |                                 |                |              |                |                |          |                |                |          |                |                |          |                |                |          |                |                |              |                |               |  |                |  |  |                |  |  |                |  |  |                |  |  |                |  |  |
|                     | Tomatoes, cucumbers, peppers |                                 |                |              |                |                |          |                |                |          |                |                |          |                |                |          |                |                |              |                |               |  |                |  |  |                |  |  |                |  |  |                |  |  |                |  |  |
| Red meat            | Beef                         |                                 |                |              |                |                |          |                |                |          | 1 item, -100%  |                |          | -100%          |                |          | 2 items, -100% |                |              | -100%          |               |  | 2 items, -100% |  |  | 2 items, -100% |  |  |                |  |  |                |  |  |                |  |  |
|                     | Meat balls/patties           |                                 |                |              | -100%          |                |          | 2 items, -100% |                |          | -79%           |                |          | 4 items, -100% |                |          | -100%          |                |              | -100%          |               |  | 4 items, -100% |  |  | 1 item, -91%   |  |  | 8 items, -100% |  |  | 2 items, -100% |  |  | 2 items, -100% |  |  |
|                     | Meat dish                    |                                 |                |              |                |                |          |                |                |          |                |                |          |                |                |          |                |                |              |                |               |  |                |  |  |                |  |  |                |  |  |                |  |  |                |  |  |
|                     | Minced meat                  |                                 |                |              | -60%           |                |          | -52%           |                |          | -100%          |                |          | -94%           |                |          | -100%          |                |              | 1 item, -100%  |               |  | -100%          |  |  | 2 items, -100% |  |  | 2 items, -100% |  |  |                |  |  |                |  |  |
|                     | Offal                        | +112%                           | +767%          |              | +171%          | +830%          |          | +182%          | +916%          |          | +202%          | +970%          |          | +137%          | +1021%         |          |                |                |              |                |               |  |                |  |  |                |  |  |                |  |  |                |  |  |                |  |  |
|                     | Pork                         |                                 |                |              |                |                |          |                |                |          |                |                |          |                |                |          |                |                |              |                |               |  |                |  |  |                |  |  |                |  |  |                |  |  |                |  |  |
|                     | Poultry                      |                                 |                |              |                |                |          |                |                |          |                |                |          |                |                |          | -11%           |                |              | -44%           |               |  | 3 items, -100% |  |  | -100%          |  |  | -100%          |  |  |                |  |  |                |  |  |
|                     | Sausages                     | -100%                           |                |              | -99%           |                |          | -100%          |                |          | 2 items, -100% |                |          |                | 2 items, -100% | -100%    | -75%           | 3 items, -100% | 1 item, -44% | 2 items, -100% |               |  |                |  |  |                |  |  |                |  |  |                |  |  |                |  |  |
|                     | Vegetable dish with meat     |                                 |                |              |                |                |          |                |                |          |                |                |          |                |                |          |                |                |              |                |               |  |                |  |  |                |  |  |                |  |  |                |  |  |                |  |  |
| Other               | Mayonnaise/dressing          |                                 |                |              | -29%           |                |          | -10%           |                |          | -5%            |                |          |                |                |          |                |                |              | -50%           |               |  | -23%           |  |  |                |  |  |                |  |  |                |  |  |                |  |  |
|                     | Salt                         | -29%                            |                | -20%         | -29%           |                | -17%     | -27%           |                | -16%     | -18%           |                | -13%     |                |                | -17%     |                |                |              |                |               |  |                |  |  |                |  |  |                |  |  |                |  |  |                |  |  |
| Solid dairy         | Cheese                       | -11%                            | 2 items, -100% | -100%        |                | 2 items, -100% | -100%    | -96%           | 2 items, -100% | -100%    | -100%          | 2 items, -100% | -100%    | 1 item, -100%  | 2 items, -100% | -100%    | 5 items, -100% | 3 items, -100% | -100%        |                |               |  |                |  |  |                |  |  |                |  |  |                |  |  |                |  |  |
|                     | Cream                        | -100%                           | 2 items, -100% | -100%        | -100%          | 1 item, -100%  | -100%    | -100%          | 1 item, -100%  | -100%    | -84%           | 1 item, -100%  | -100%    | 2 items, -100% | 1 item, -100%  | -100%    | 3 items, -100% | 2 items, -100% | -100%        |                |               |  |                |  |  |                |  |  |                |  |  |                |  |  |                |  |  |
|                     | Milk                         | +51%                            | +74%           | +289%        | +45%           | +56%           | +250%    | -15%           | +55%           | +247%    | -3%            | +35%           | +248%    | -40%           |                | +242%    | -33%           | 1 item, -100%  | +140%        |                |               |  |                |  |  |                |  |  |                |  |  |                |  |  |                |  |  |
| Other               | Nuts and seeds               |                                 |                |              |                |                |          |                |                |          |                |                |          |                |                |          |                |                |              |                |               |  |                |  |  |                |  |  |                |  |  |                |  |  |                |  |  |
| Other               | Sugar and sweets             |                                 |                |              |                |                |          |                |                |          |                |                |          |                |                |          |                |                |              |                |               |  |                |  |  |                |  |  |                |  |  |                |  |  |                |  |  |
| Cereals             | Crisp bread                  |                                 |                |              |                |                |          |                |                |          |                |                |          |                |                |          |                |                |              |                |               |  |                |  |  |                |  |  |                |  |  |                |  |  |                |  |  |
|                     | Bread                        |                                 |                | -100%        |                |                | -100%    |                |                | -100%    |                |                | -100%    |                |                | -100%    |                |                |              |                |               |  | -100%          |  |  |                |  |  |                |  |  |                |  |  |                |  |  |
|                     | Flour or starch              |                                 |                |              |                |                |          |                |                |          |                |                |          |                |                |          |                |                |              |                |               |  |                |  |  |                |  |  |                |  |  |                |  |  |                |  |  |

**Figure S1.** Summary of the RD for individual food items when minimizing TRD while applying constraints on nutritional adequacy and relative GHGE reductions (Model 2, TRD<sub>min</sub>). <sup>1</sup>No constraint on maximum allowed amount of greenhouse gas emissions per meal; GHGE, Greenhouse gas emissions; RD, Relative deviation of individual food items from observed food supply after optimization, according to main food categories and food subcategories; TRD, Total relative deviation; TRD<sub>min</sub>, optimized for minimum total relative deviation with unconstrained RD individual foods.

|                    |                              | GHGE Unconstrained <sup>1</sup> |                |                | -10% GHGE     |                |                | -20% GHGE     |                |                | -30% GHGE     |                |                | -40% GHGE      |                |                |
|--------------------|------------------------------|---------------------------------|----------------|----------------|---------------|----------------|----------------|---------------|----------------|----------------|---------------|----------------|----------------|----------------|----------------|----------------|
|                    |                              | RD                              |                |                | RD            |                |                | RD            |                |                | RD            |                |                | RD             |                |                |
|                    |                              | School 1                        | School 2       | School 3       | School 1      | School 2       | School 3       | School 1      | School 2       | School 3       | School 1      | School 2       | School 3       | School 1       | School 2       | School 3       |
| Food group         | Food subgroup                |                                 |                |                |               |                |                |               |                |                |               |                |                |                |                |                |
| Eggs               | Eggs, raw/prepared           |                                 | 3 items, +200% | 2 items, +200% |               | 3 items, +200% | 2 items, +200% |               | 3 items, +200% | 2 items, +200% |               | 3 items, +200% | 2 items, +200% | +75%           | 3 items, +200% | 2 items, +200% |
| Other              | Juice and nectar             |                                 |                |                |               |                |                |               |                |                |               |                |                | 3 items, -75%  |                |                |
| Solid fats         | Butter                       | -75%                            |                | -75%           | -75%          |                | 1 item, -75%   | -75%          |                | 1 item, -75%   | -75%          |                | 1 item, -75%   | -75%           |                | 1 item, -75%   |
|                    | Margarine                    | -75%                            | -36%           |                | -75%          |                | 1 item, -16%   | -37%          | +24%           | 1 item, +20%   | +49%          | +27%           | 1 item, +21%   | +103%          | +120%          | 1 item, +85%   |
|                    | Oils                         |                                 |                | 1 item, -75%   |               | -48%           | 1 item, -56%   |               | -75%           | 1 item, -75%   |               | -75%           | 1 item, -52%   | -8%            | -75%           | 1 item, -75%   |
| Fish               | Salmon                       |                                 |                | +200%          |               |                | +200%          |               |                | +200%          |               |                | +199%          |                |                | +200%          |
|                    | White fish                   |                                 |                |                |               |                |                |               |                |                |               |                |                | -17%           |                | -75%           |
| Fruits and berries | Berries                      |                                 |                |                |               |                |                |               |                |                |               |                | +64%           |                |                | +174%          |
|                    | Exotic fruits                |                                 |                |                |               |                |                |               |                |                |               |                |                | -75%           |                |                |
| Vegetables         | Legumes                      |                                 | +200%          | 1 item, +200%  |               | 1 item, +200%  | 1 item, +200%  |               | 1 item, +200%  | 2 items, +200% |               | 2 items, +200% | 2 items, +200% |                | 3 items, +200% | 2 items, +200% |
|                    | Potatoes                     |                                 |                | 1 item, +168%  |               | 1 item, +85%   | 1 item, +123%  |               | 1 item, +114%  |                |               | 1 item, +190%  |                |                | 1 item, +190%  |                |
|                    | Roots and tubers             | +119%                           |                |                | +140%         |                |                | +182%         |                |                | +200%         |                |                | +103%          | +61%           |                |
|                    | Pulses                       |                                 |                |                |               |                |                |               |                |                |               |                |                | -75%           |                | -75%           |
| Red meat           | Beef                         |                                 |                |                |               |                |                |               |                |                |               | 2 items, -75%  | -75%           | -75%           | 2 items, -75%  | 3 items, -75%  |
|                    | Lamb                         |                                 |                |                |               |                |                |               |                |                |               |                |                |                |                | -75%           |
|                    | Meat balls/patties           |                                 |                |                | 1 item, -75%  | -62%           |                | 3 items, -75% | -75%           | -50%           | 5 items, -75% | -75%           | 2 items, -75%  | 8 items, -75%  | 3 items, -75%  | 3 items, -75%  |
|                    | Meat dish                    |                                 |                |                | 1 item, -34%  |                |                | 1 item, -12%  |                |                | 1 item, -40%  |                |                | -75%           |                |                |
|                    | Minced meat                  |                                 | +79%           | -46%           |               |                |                |               | -60%           | -75%           |               | -75%           | 2 items, -75%  |                | 2 items, -75%  | 2 items, -75%  |
|                    | Poultry                      | Offal                           | +159%          | +200%          |               | +170%          | +200%          |               | +187%          | +200%          |               | +192%          | +200%          |                | +111%          | +200%          |
|                    | Chicken                      |                                 |                |                |               |                |                |               |                |                |               |                |                | 2 items, -75%  | 1 item, -75%   | -75%           |
|                    | Vegetable dish with meat     |                                 | -2%            |                |               |                |                |               | -47%           |                |               | -75%           | -75%           | 2 items, -75%  | -75%           | 2 items, -75%  |
| Other              | Mayonnaise/dressing          |                                 |                | -75%           |               |                | -75%           |               |                |                |               |                | -75%           | -75%           |                | -75%           |
|                    | Salt                         | -33%                            |                | -16%           | -28%          |                | -18%           | -23%          |                | -15%           | -20%          |                | -9%            |                |                |                |
|                    | Ketchup, mustard             |                                 | +200%          |                |               | +200%          |                |               | +200%          |                |               | +200%          |                | -75%           | +200%          |                |
| Solid dairy        | Cheese                       | 2 items, -75%                   | 4 items, -75%  | -75%           | 1 item, -75%  | 3 items, -75%  | -75%           | 2 items, -75% | 3 items, -75%  | -75%           | 4 items, -75% | 3 items, -75%  | -75%           | 6 items, -75%  | 4 items, -75%  | 2 items, -75%  |
|                    | Cream                        | 3 items, -75%                   | 3 items, -75%  | 1 item, -75%   | 1 item, -72%  | 1 item, -55%   |                | 2 items, -75% | 2 items, -75%  | 2 items, -75%  | 3 items, -75% | 2 items, -75%  | -75%           | 3 items, -75%  | 3 items, -75%  | 2 items, -75%  |
|                    | Other dairy                  |                                 |                | 1 item, -70%   | 2 items, -75% | 3 items, -75%  | 2 items, -75%  | 2 items, -75% | 2 items, -75%  | 2 items, -75%  | 3 items, -75% | 2 items, -75%  | -75%           | 3 items, -75%  | 3 items, -75%  | 2 items, -75%  |
|                    | Milk                         | +39%                            | 1 item, -75%   | 1 item, +200%  | +39%          | +37%           | 1 item, +200%  | +21%          | +25%           | +3%            | 1 item, -56%  | +25%           | +200%          | -35%           |                | +168%          |
| Other              | Yoghurt and sour milk        |                                 | -75%           | 1 item, +68%   |               | -75%           | 1 item, +119%  |               | -75%           |                | 1 item, -3%   | -61%           |                |                | -75%           | -75%           |
|                    | Nut or seed product          | -34%                            |                |                |               |                |                |               |                |                |               |                |                |                |                |                |
| Cereals            | Crisp bread                  |                                 |                |                |               | +200%          |                |               | +200%          |                | +68%          | +200%          |                | 2 items, +200% | 1 item, +200%  | 1 item, +127%  |
|                    | Bread                        |                                 | +200%          |                |               | +200%          |                |               | +200%          | +8%            |               | +200%          | +17%           |                | +200%          |                |
|                    | Breakfast cereals            |                                 |                |                |               | -22%           |                |               |                |                |               |                | -16%           |                |                | -22%           |
|                    | Flour or starch              |                                 |                |                |               | +200%          |                |               |                |                |               |                |                |                | +200%          |                |
|                    | Grains and bran              |                                 |                |                |               |                |                |               | +200%          |                |               | +200%          |                |                | +200%          |                |
|                    | Pasta, bulgur, couscous etc. |                                 |                |                |               |                |                |               | +200%          |                |               | +200%          |                |                | +200%          |                |
| Bread              | Rice                         |                                 | -75%           | -75%           |               | -75%           | -75%           |               | -75%           | -75%           |               | -67%           | -75%           | -75%           | -75%           | -75%           |

**Figure S2.** Summary of the RD for individual food items when minimizing TRD while applying constraints on nutritional adequacy, relative GHGE reductions, and additional constraints on the RD of individual food items (Model 3, CRD<sub>min</sub>).<sup>1</sup>No constraint on maximum allowed amount of carbon dioxide equivalents (CO<sub>2</sub>eq) per optimized food supply; GHGE, Greenhouse gas emissions; TRD, Total relative deviation; RD, Relative deviation of individual food items from baseline food supply after optimization, according to main food categories and food subcategories; CRD<sub>min</sub>, optimized for minimum total relative deviation while constraining the relative deviation of individual food items to a range between -75% and +200%.
